# Supplementary material
Source: PubMed Central journal article supplement (PMC7613274)
Supplement: EMS151992-supplement-Supplementary_Material.pdf [file EMS151992-supplement-Supplementary_Material.pdf]

## Supplementary Material: Optimal design of adaptively sampled NMR experiments for measurement of methyl group dynamics with application to a ribosome-nascent chain complex

Christopher A. Waudby, Charles Burrige, John Christodoulou

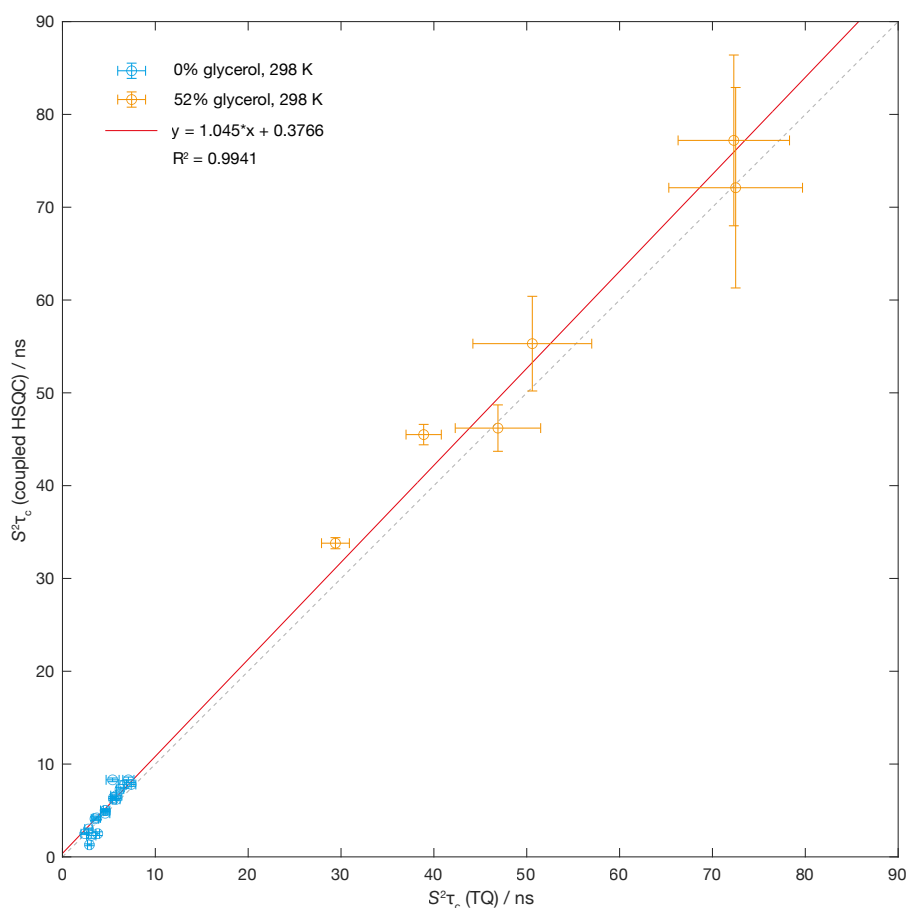

**Figure S1.** Comparison of  $S^2\tau_c$  measurements determined for resolved methyl resonances in  $[^2\text{H},\text{ILV-}^{13}\text{CH}_3]$ -labelled FLN5 (298 K and 0% or 52% w/w  $\text{d}_8$ -glycerol as indicated), by measurement of the build-up of triple quantum magnetisation (Sun et al. 2011, *J Phys Chem B*), and by frequency-domain fitting of F1-coupled HSQC spectra as described in this work.
